# Supplementary material for: Convenient synthesis of uncovered imprinted microspheres byGanoderma lucidumspore-stabilized pickering emulsion polymerization and their enhanced recognition of spiramycin
Source: Royal Society of Chemistry journal article supplement (doi:10.1039/c9ra07745f), 2019-01-01
Supplement: c9ra07745f1.pdf [file c9ra07745f1.pdf]

## Supplementary Materials:

Convenient Synthesis of Uncovered Imprinted Microspheres by *Ganoderma Lucidum*  
Spore-Stabilized Pickering Emulsion Polymerization and Their Enhanced  
Recognition of Spiramycin

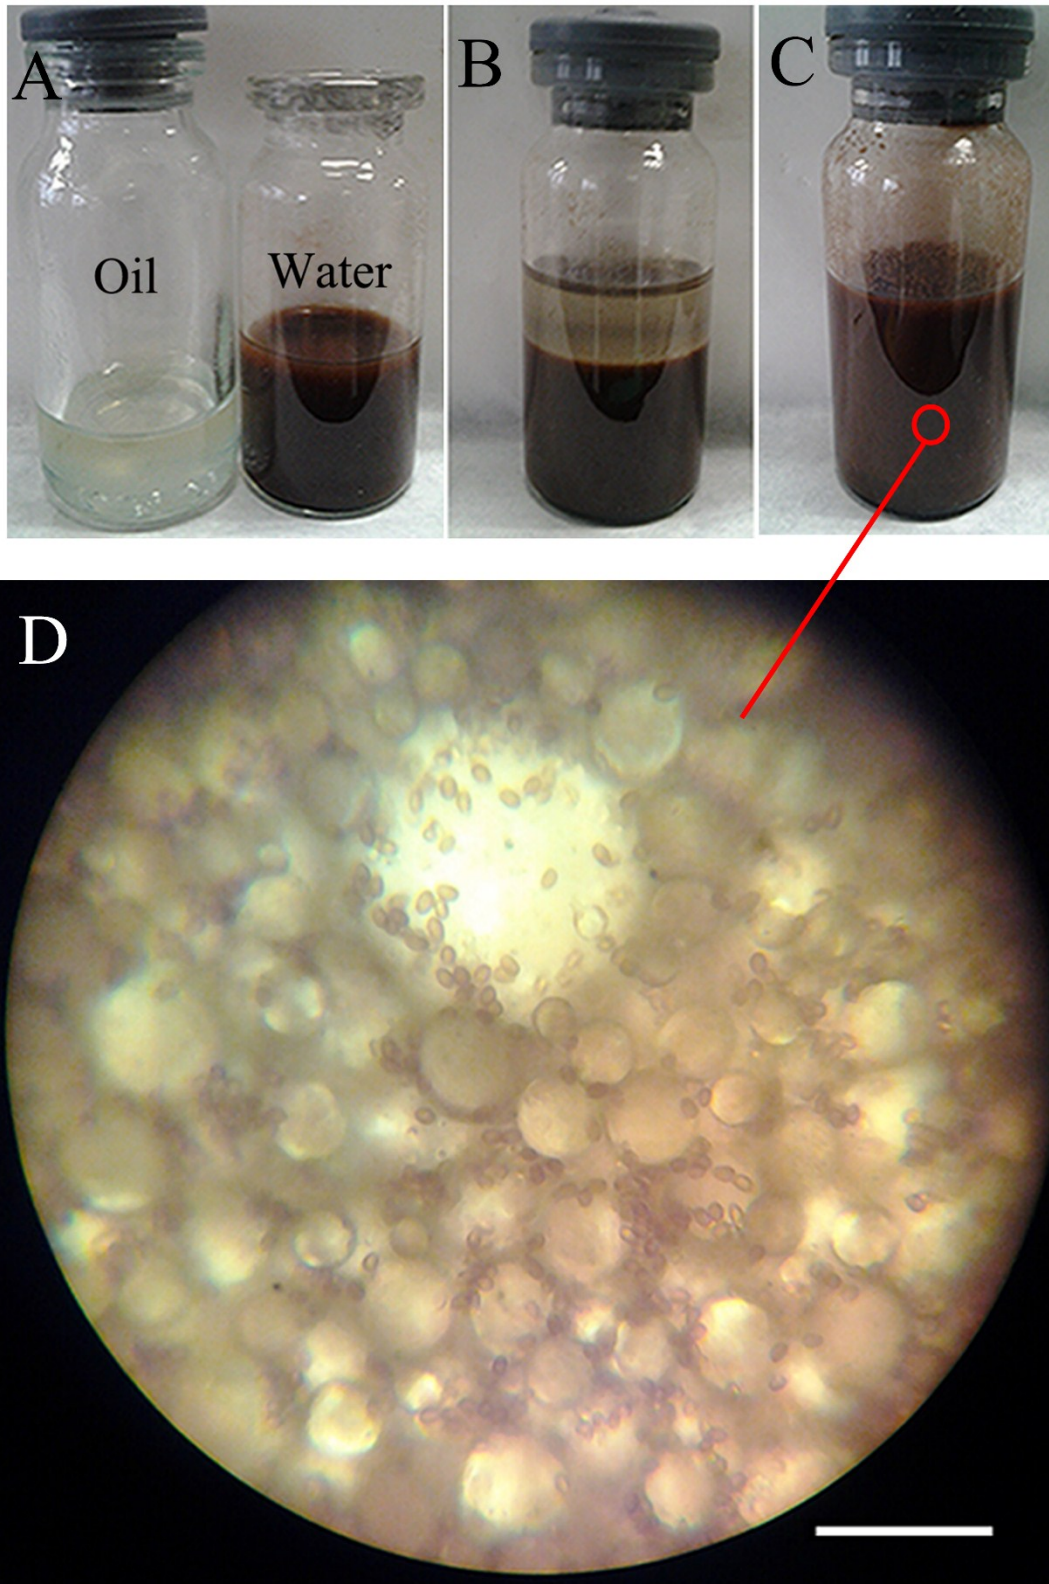

Fig. S1 Pictures of oil-phase and water-phase dispersion (A), the Pickering emulsion before (B) and after (C) formation, the micrographs of o/w emulsion (D), (scale bars: 100  $\mu\text{m}$ ).

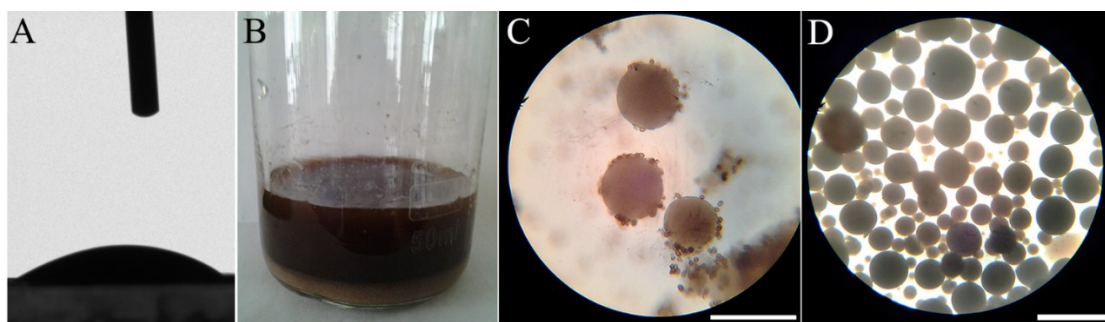

Fig. S2 The contact angle of GLS (A), the picture of natural separation of GLS particles from SP-MIMs (B), and the micrographs of SP-MIMs suspended in water: the microspheres in process of water treatment (C) and after treatment by water (D), (scale bars: 100  $\mu\text{m}$ ).

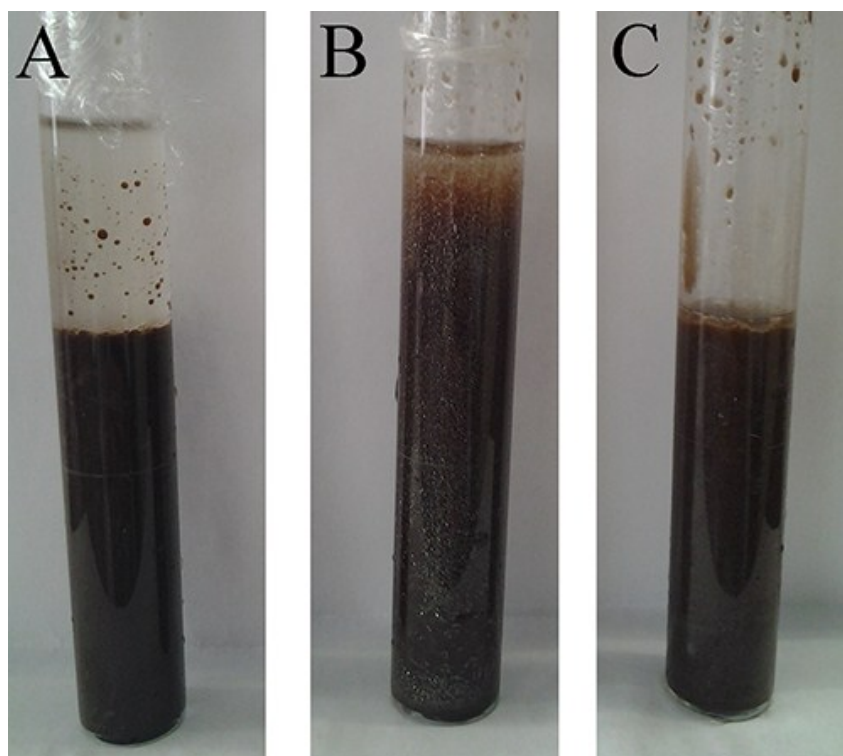

Fig. S3 Digital photograph of Pickering emulsions by different amount of stabilizer (GLS).

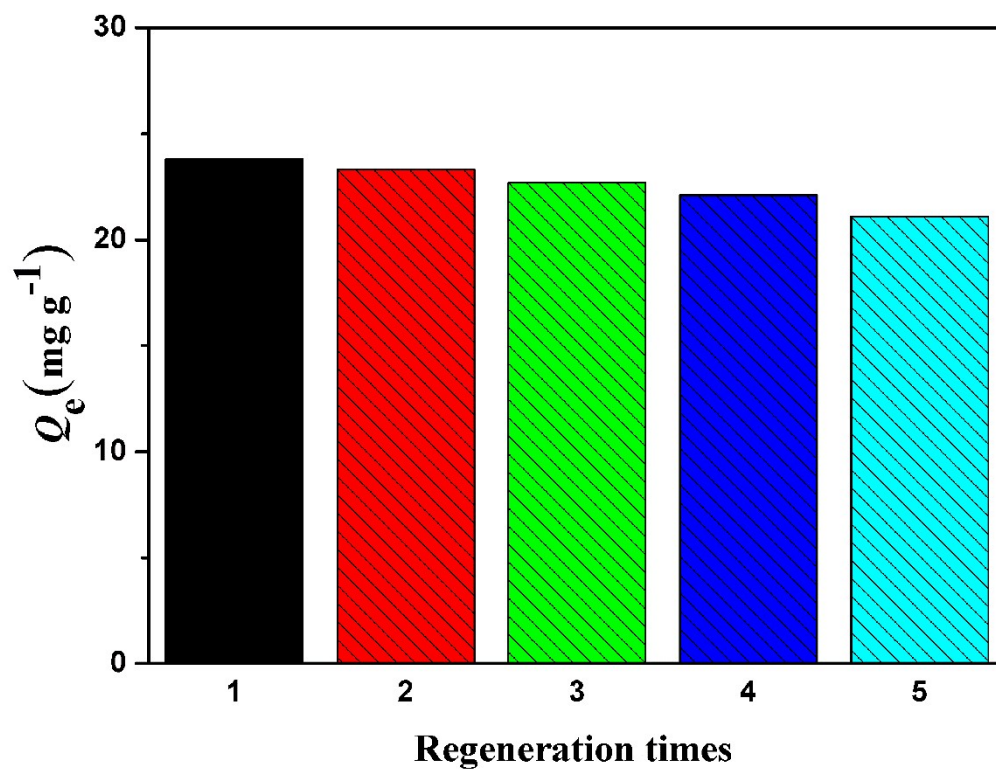

Fig. S4 Regenerative property of SP-MIMs for five cycles.

**Table S1**

The surface area and pore structure of GLS, SP-MIMs and SP-NIMs by BET/BJH method.

| Sample  | Specific surface area (m <sup>2</sup> /g) | Cumulative pore volume (mL/g) | Average pore diameter (nm) |
|---------|-------------------------------------------|-------------------------------|----------------------------|
| GLS     | 2.77                                      | 0.0461                        | 14.11                      |
| SP-MIMs | 374.78                                    | 0.8027                        | 11.25                      |
| SP-NIMs | 309.22                                    | 0.7225                        | 10.12                      |
